# Supplementary material for: Alteration of Microbiome Profile by D-Allulose in Amelioration of High-Fat-Diet-Induced Obesity in Mice
Source: PubMed Central journal article supplement (PMC7071329; doi:10.3390/nu12020352), 2020-01-29
Supplement: nutrients-12-00352-s001.pdf [file nutrients-12-00352-s001.pdf]

**Supplementary table 1. SYRCLE’s tools risk of bias**

| <b>Entry</b>                | <b>Judgement</b> | <b>Support for judgement</b>                                                                            |
|-----------------------------|------------------|---------------------------------------------------------------------------------------------------------|
| Sequence generation         | Low risk         | Quote: “The mice were then randomly divided in to four group~.”                                         |
| Baseline characteristics    | Low risk         | Figure 1A, There was no significant difference in 0week bodyweight among the experiment groups          |
| Allocation concealment      | High risk        | No allocation concealment                                                                               |
| Random housing              | Low risk         | The animals were randomly housed during the experiment.                                                 |
| Blinding (performance bias) | High risk        | We didn’t blind                                                                                         |
| Random outcome assessment   | Unclear          | We didn’t select animals for outcome assessment.<br>The result was analyzed using all animals (36mice). |
| Blinding (detection bias)   | High risk        | We didn’t blind                                                                                         |
| In complete outcome data    | Unclear          | There was no incomplete outcome data                                                                    |
| Selective outcome reporting | Low risk         | There was no interference of selective outcome reporting.<br>We didn’t select outcome data.             |
| Other sources of bias       | Low risk         |                                                                                                         |
